# Supplementary material for: The coordination chemistry of fluorescent pyridinyl– and quinolinyl–phthalimide ligands with the {AuI–PPh3} cationic unit
Source: Royal Society of Chemistry journal article supplement (doi:10.1039/b905123f), 2009-01-01
Supplement: b905123f.pdf [file b905123f.pdf]

# The coordination chemistry of fluorescent pyridyl- and quinolyl-phthalimide ligands with the {Au<sup>I</sup>PPh<sub>3</sub>} cationic unit

Lucy A. Mullice,<sup>a</sup> Flora L. Thorp-Greenwood,<sup>a</sup> Rebecca H. Laye,<sup>b</sup> Benson M. Kariuki,<sup>a</sup> Michael P. Coogan<sup>a</sup> and Simon J.A. Pope<sup>\*a</sup>

## Supplementary Information

**Table 1** Selected bond lengths and bond angles for the ligands

| L <sup>3</sup>            |            | L <sup>4</sup> |            | L <sup>6</sup> |            |
|---------------------------|------------|----------------|------------|----------------|------------|
| <b>Bond distances (Å)</b> |            |                |            |                |            |
| N1-C1                     | 1.341(2)   | N1-C1          | 1.4018(18) | N1-C1          | 1.3212(14) |
| N1-C5                     | 1.3416(19) | N1-C8          | 1.3947(18) | N1-C9          | 1.3697(13) |
| N2-C6                     | 1.4504(16) | N1-C9          | 1.4616(18) | N2-C8          | 1.4287(13) |
| N2-C7                     | 1.3992(16) | N2-C11         | 1.3460(9)  | N2-C10         | 1.3999(13) |
| N2-C14                    | 1.3964(17) | N2-C15         | 1.340(2)   | N2-C17         | 1.4071(14) |
| <b>Bond angles (°)</b>    |            |                |            |                |            |
| C1-N1-C5                  | 115.97(13) | C1-N1-C8       | 112.18(12) | C1-N1-C9       | 116.82(9)  |
| C6-N2-C7                  | 123.13(11) | C1-N1-C9       | 123.37(12) | C8-N2-C10      | 122.82(9)  |
| C6-N2-C14                 | 124.35(11) | C8-N1-C9       | 124.44(12) | C8-N2-C17      | 125.06(9)  |
| C7-N2-C14                 | 112.44(10) | C11-N2-C15     | 117.37(13) | C10-N2-C17     | 112.02(8)  |
